# Supplementary material
Source: ML conference proceedings conference paper supplement (https://aclanthology.org/2021.cmcl-1.22)

# MDA model

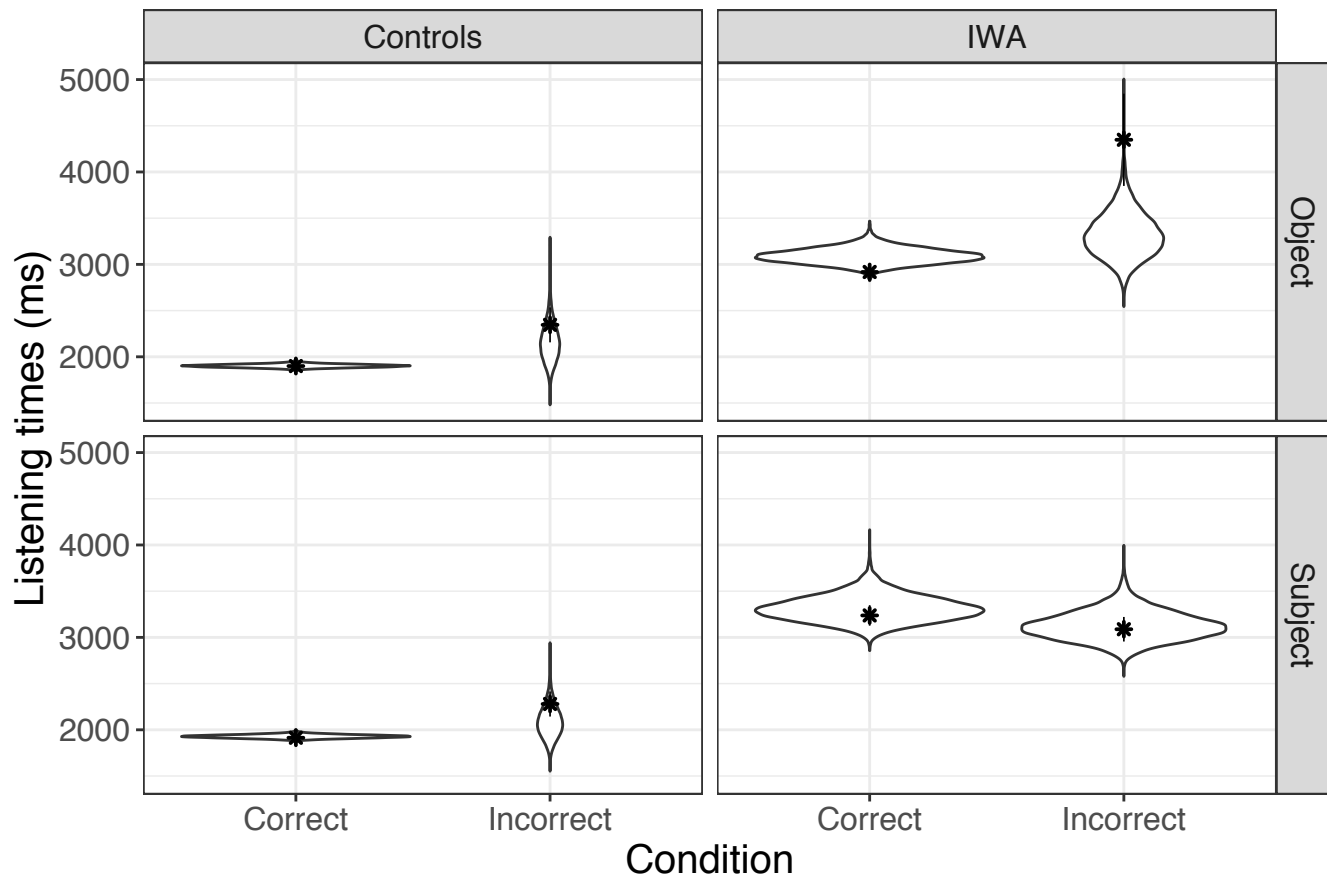

Supplement: OptionalSupplementaryData [file 2021.cmcl-1.22.OptionalSupplementaryData.zip]

# Posterior distribution of $\theta$

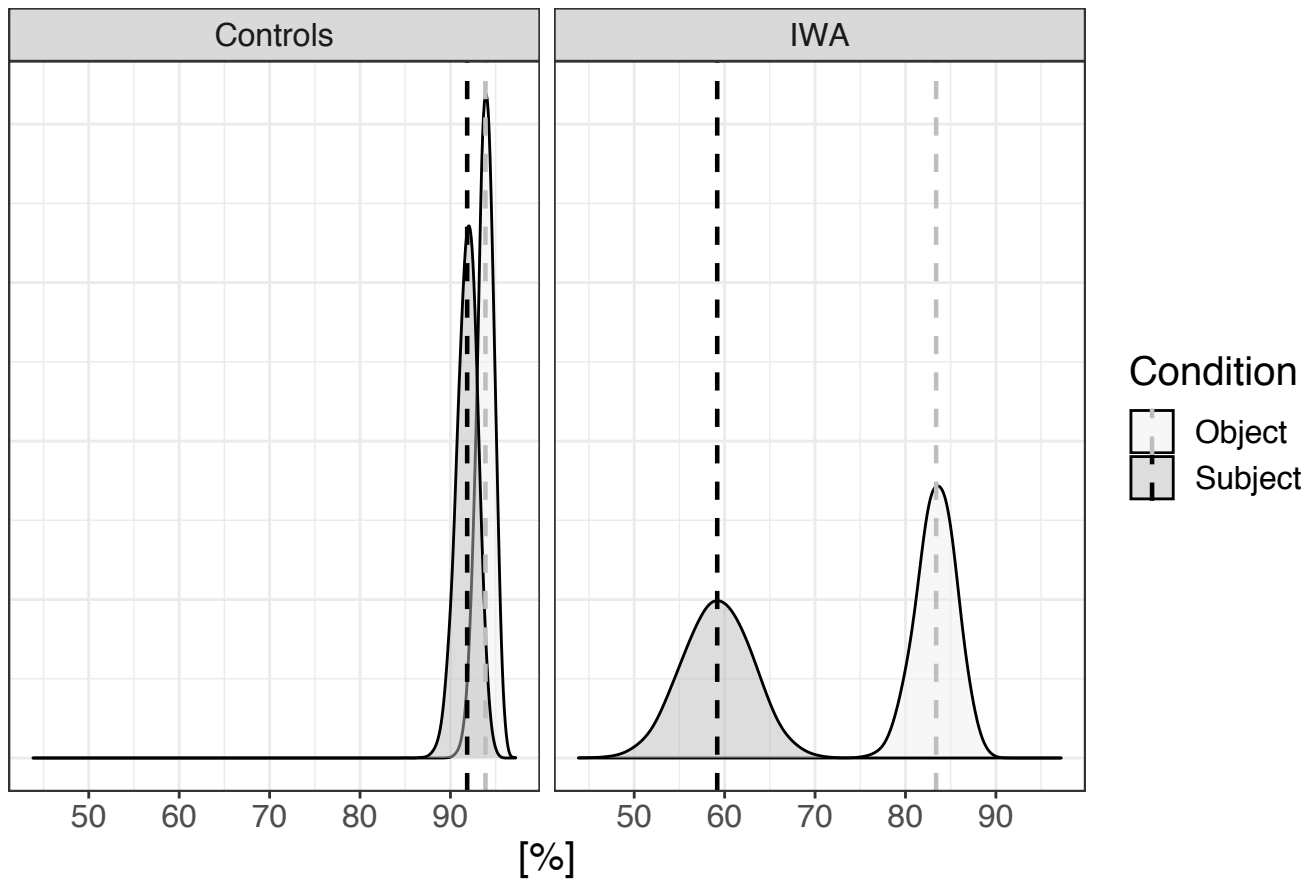

Supplement: OptionalSupplementaryData [file 2021.cmcl-1.22.OptionalSupplementaryData.zip]

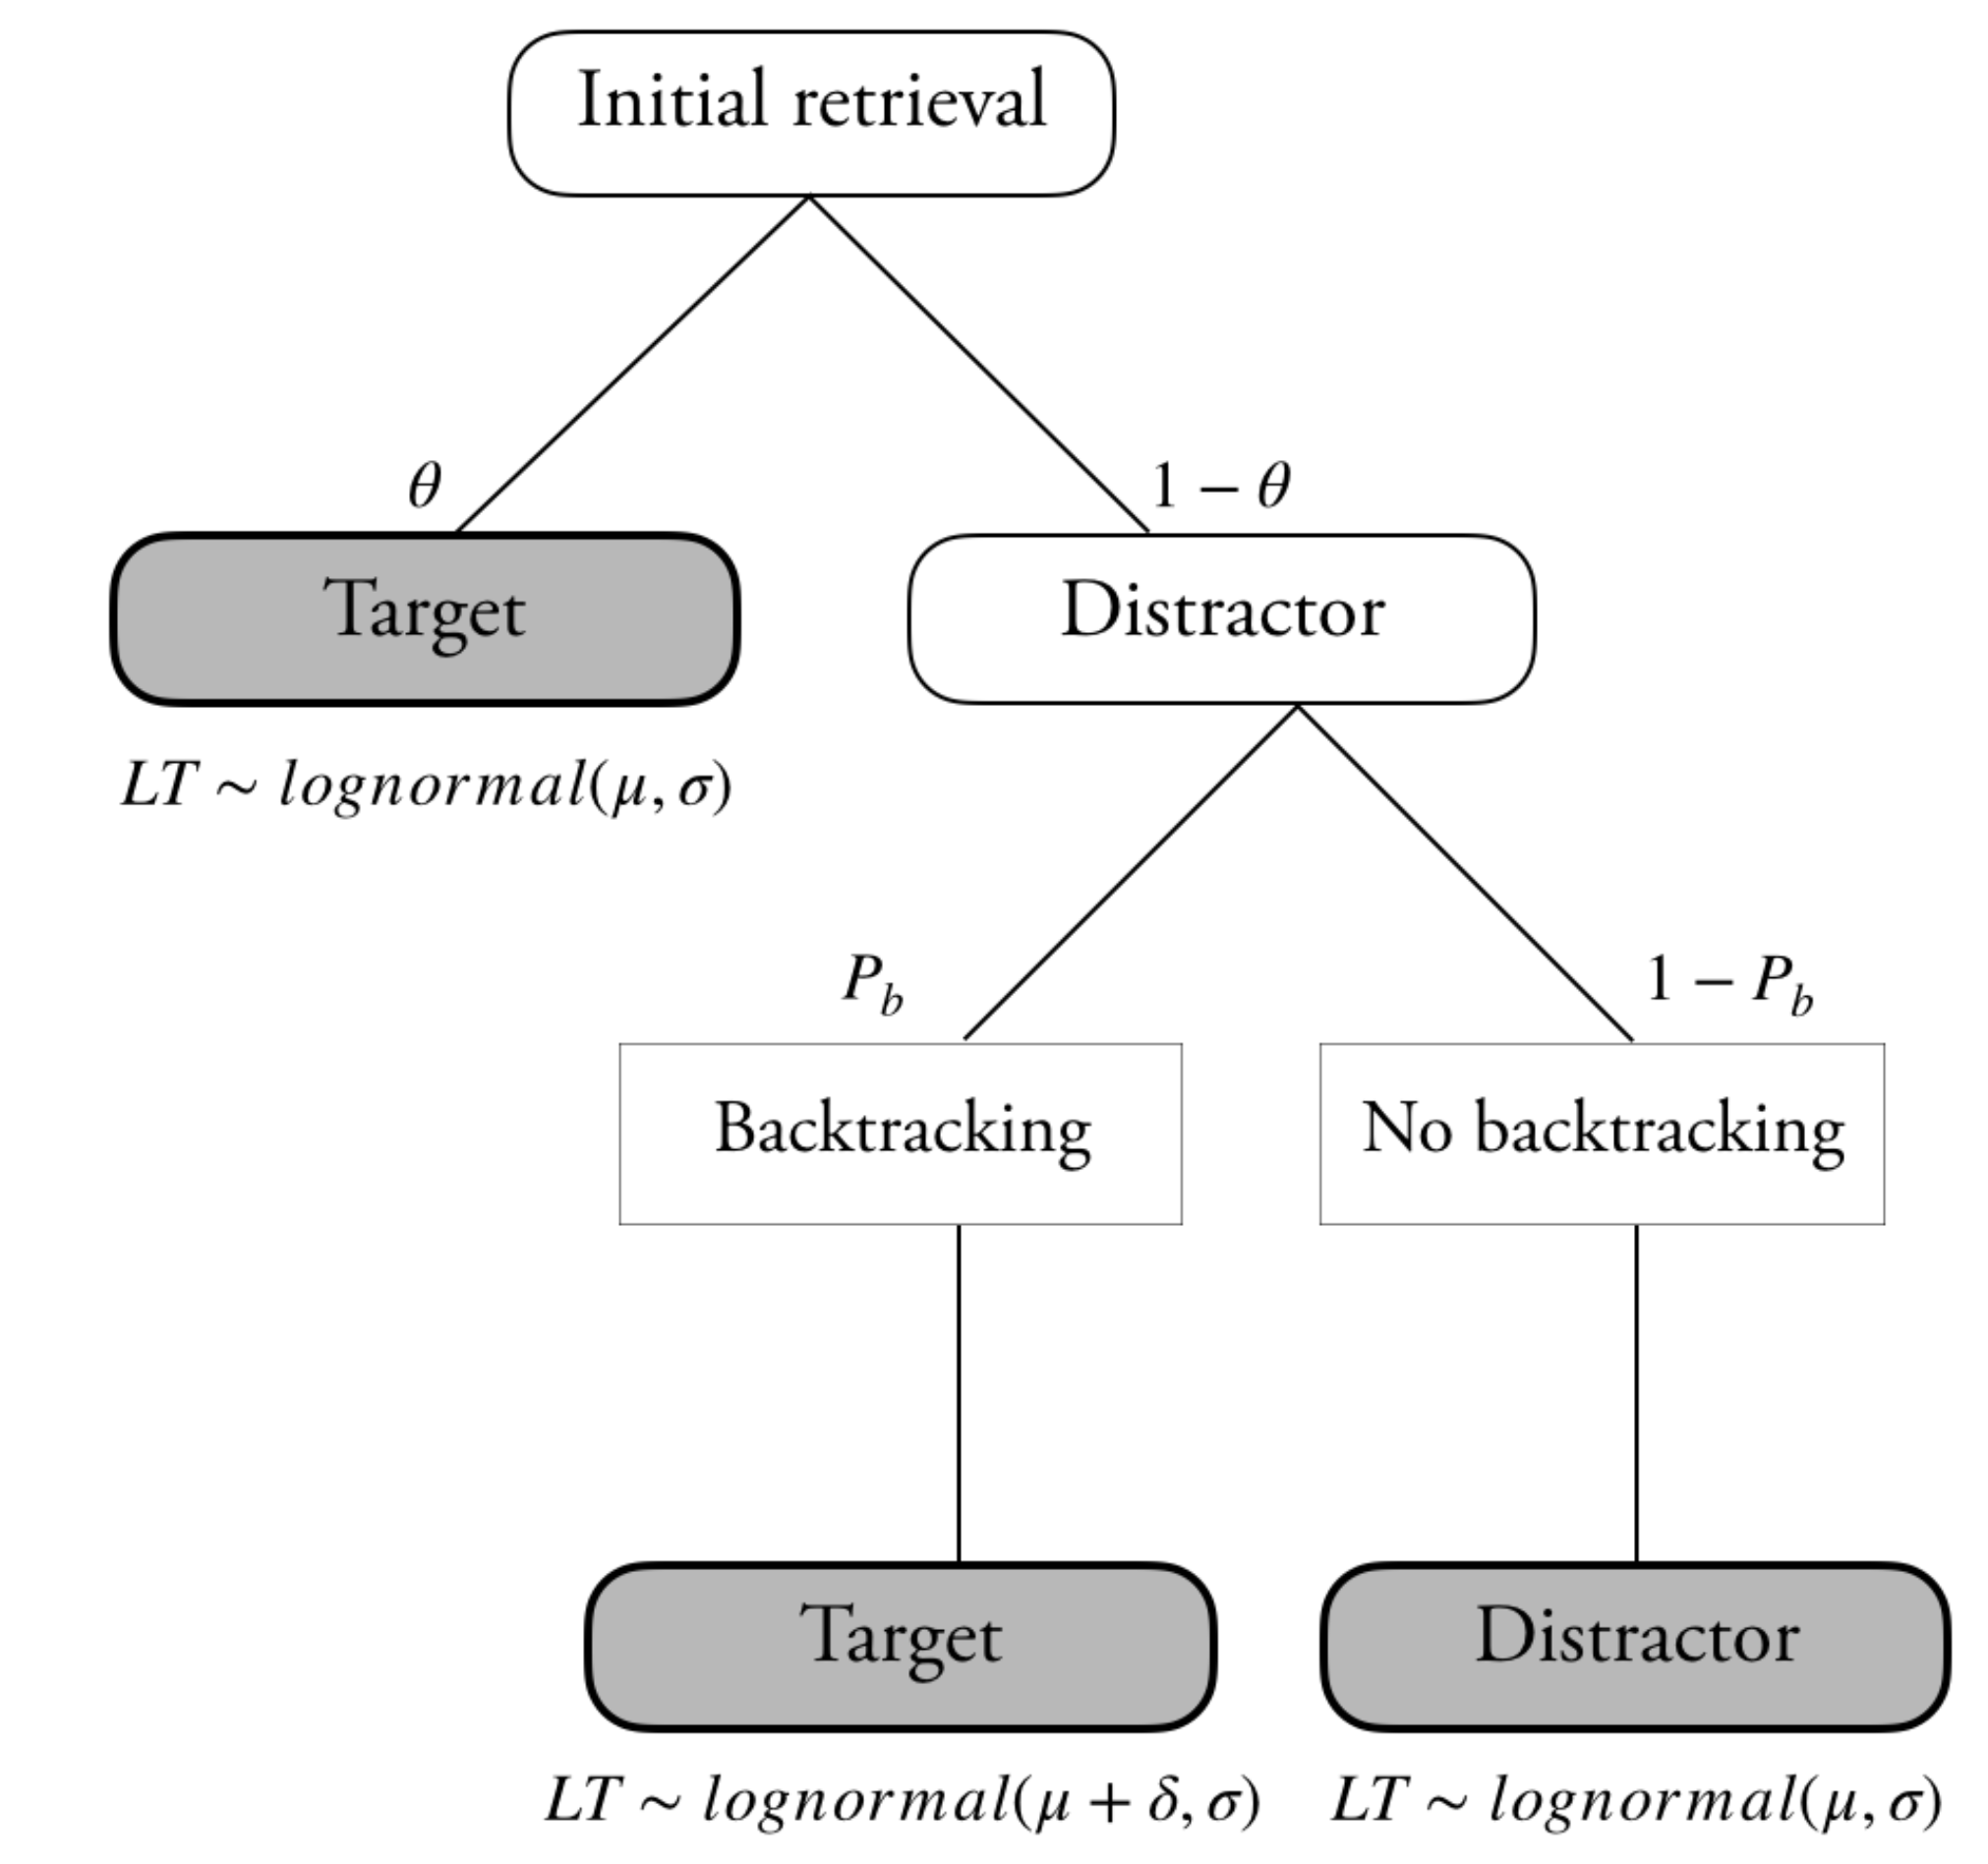

Supplement: OptionalSupplementaryData [file 2021.cmcl-1.22.OptionalSupplementaryData.zip]

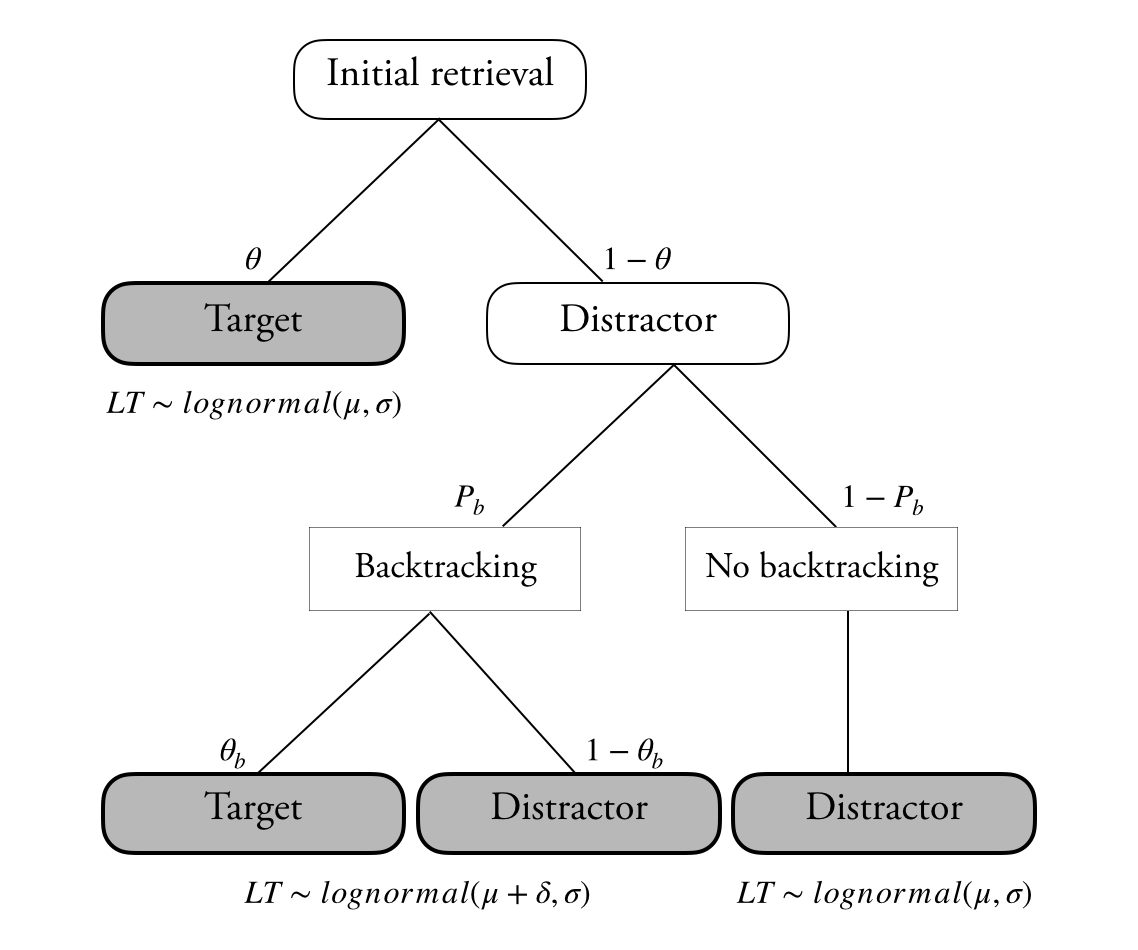

Supplement: OptionalSupplementaryData [file 2021.cmcl-1.22.OptionalSupplementaryData.zip]

# Posterior distribution of $\theta$

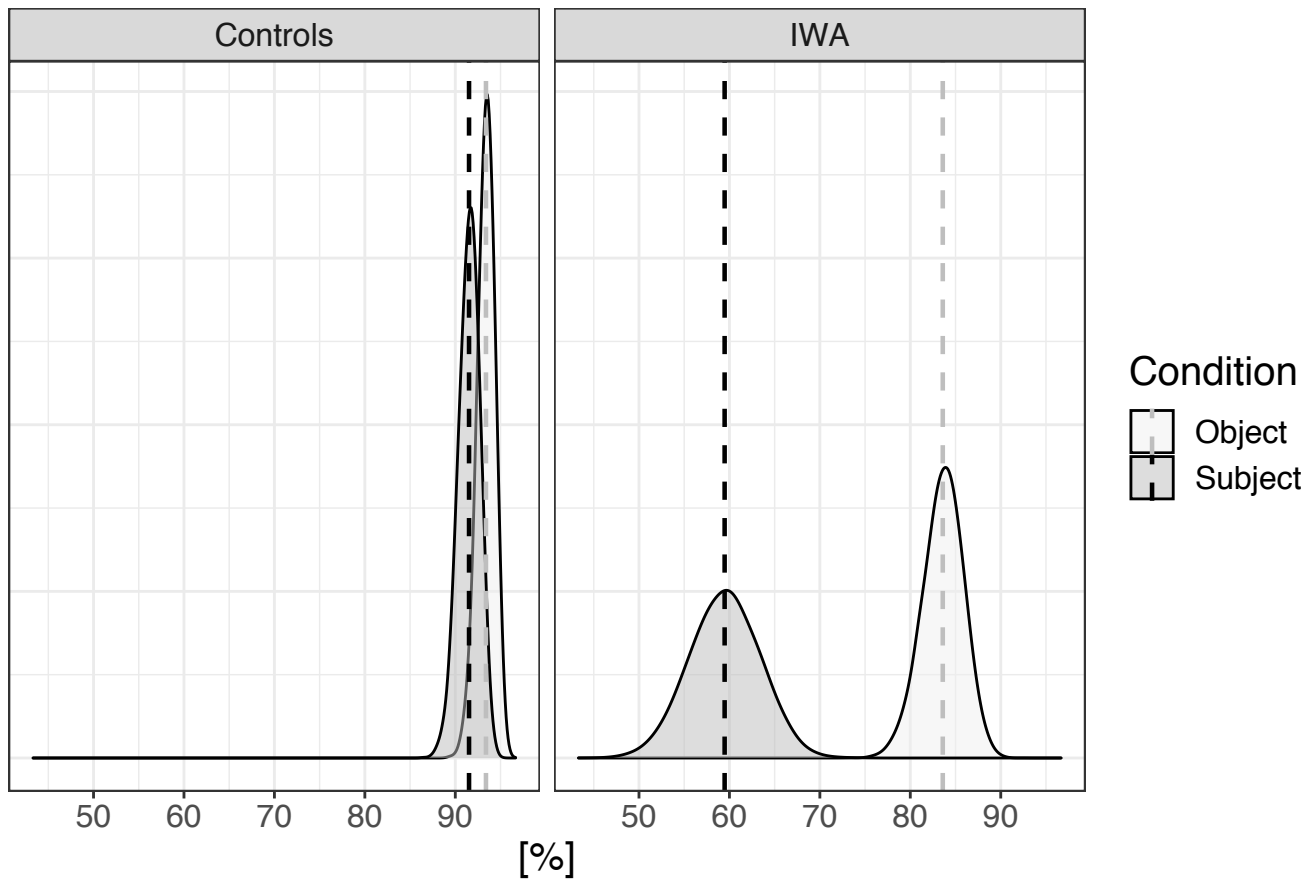

Supplement: OptionalSupplementaryData [file 2021.cmcl-1.22.OptionalSupplementaryData.zip]

Posterior distribution of  $\theta_b$

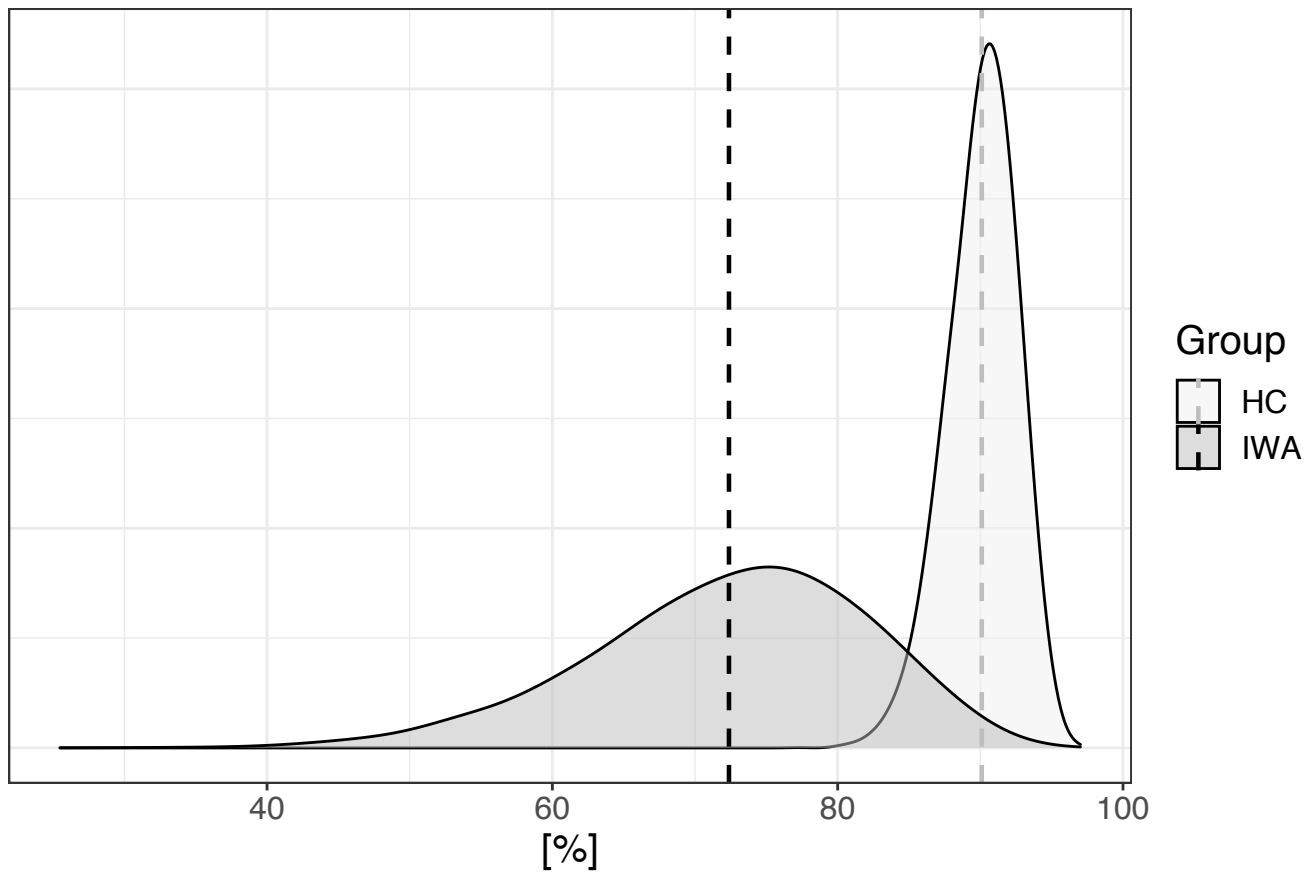

Supplement: OptionalSupplementaryData [file 2021.cmcl-1.22.OptionalSupplementaryData.zip]

# DA model

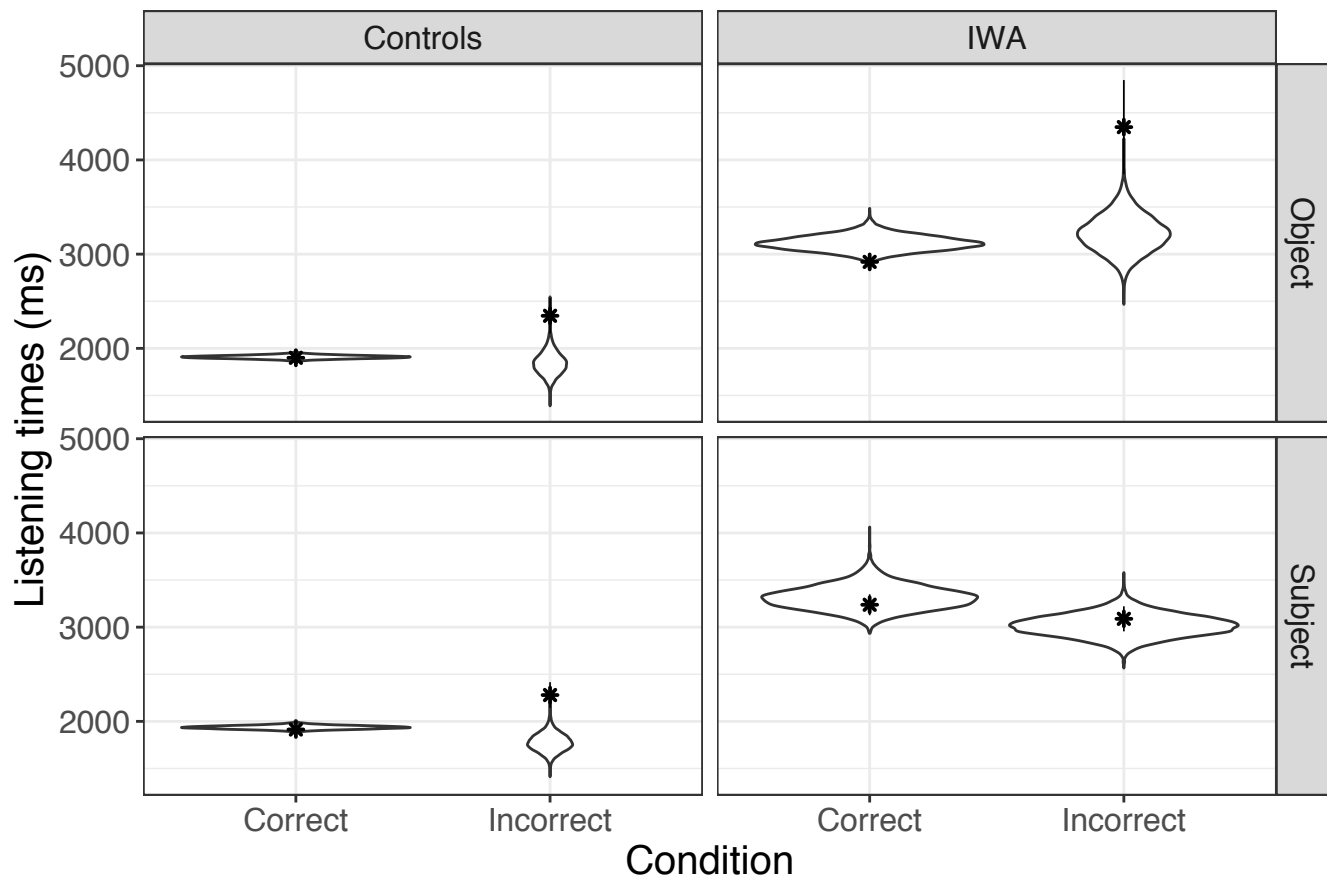

Supplement: OptionalSupplementaryData [file 2021.cmcl-1.22.OptionalSupplementaryData.zip]
